# Supplementary material
Source: Elsevier journal article supplement (https://www.sciencedirect.com/science/article/pii/S2254887419301092)
Supplement: mmc1 [file S2254887419301092:mmc1.pdf]

Material suplementario.

Metodología:

Encuesta anónima que contenía 12 preguntas de respuesta única o múltiple más una de campo abierto de carácter narrativo. Las preguntas se formularon de modo consecutivo para no condicionar las respuestas, aunque exploraban los siguientes ítems o dominios:

- 1) Situación profesional: preguntas 1-2
- 2) Organización y recursos asistenciales: preguntas 3-6
- 3) Valoración del estado congestivo: preguntas 7-8
- 4) Valoración de la congestión residual: preguntas 9-12
- 5) Concepto de congestión residual: pregunta 13

La encuesta se realizó mediante el *software* libre proporcionado por *Google Drive*. Se envió a través de la lista de distribución del Grupo de Insuficiencia Cardíaca de la Sociedad de Medicina Interna. Las respuestas son anónimas ya que no se exigía el correo electrónico, ni otra identificación para contestarla.

A continuación se exponen las preguntas con sus respuestas, especificando las que admitían opción de respuesta múltiple.

1.- Años de ejercicio desde la finalización de la residencia:

- A. Residente
- B. Menos de 5 años
- C. Entre 5 y 15 años
- D. Más de 15 años

2.- Posición profesional actual

- A. MIR
- B. FEA/Médico Adjunto
- C. Médico de Familia
- D. Urgencias Hospitalarias
- E. Jefe de Sección
- F. Jefe de Servicio

3.- Tamaño de mi hospital

- A. < 200 camas
- B. 200-500
- C. 500-1000
- D. >1000

4.- Existe algún dispositivo asistencial específico para la IC

- A. No, se trata en el conjunto del servicio
- B. Si, consulta monográfica
- C. Si, Unidad de IC
- D. UMIPIC

5.- Qué estancia media tienen los ingresos por IC en tu servicio

- A. < 5 días
- B. 5-10
- C. >10

6.- Disponibilidad de recursos para los ingresos por IC en tu práctica habitual (señala uno o varios)

- A. Péptidos natriuréticos (BNP/NT-proBNP)
- B. Ecografía de bolsillo
- C. Ecocardiograma reglado
- D. Ecocardiograma reglado fácilmente accesible (respuesta en menos de 48 h)
- E. RM cardíaca
- F. Cateterismo

7.- Cuál de los siguientes (uno o varios) crees que es más fiable como síntoma o signo de congestión (señala uno o varios)

- A. Disnea
- B. Ortopnea
- C. Disnea paroxística nocturna
- D. Ingurgitación yugular
- E. Hepatomegalia
- F. Ascitis
- G. Edemas

- H. BNP/NT-proBNP
- I. CA125
- J. Ecografía pulmonar
- K. Ecografía de la vena cava inferior
- L. Otros

8.- Que criterio empleas para pasar los diuréticos de asa de la vía i.v. a la oral (uno o varios)

- A. Mejoría de la disnea
- B. Mejoría de la clase funcional NYHA
- C. Reducción de los edemas
- D. Reducción de la IY
- E. Pérdida de peso
- F. Otros

9.- Que criterio empleas para dar el alta al paciente que ha ingresado por descompensación de IC (uno o varios):

- A. Ausencia completa de disnea en reposo
- B. Mejoría de la clase funcional NYHA
- C. Reducción de los edemas
- D. Reducción de la IY
- E. Pérdida de peso
- F. Diurético oral a dosis estable
- G. Otros criterios

10.- ¿Mides la eficacia de los diuréticos de asa?

- A. Si
- B. No

11.- Si lo mides, cómo lo haces (uno o varios):

- A. Control diario de diuresis
- B. Control de peso diario
- C. Ecografía pulmonar seriada
- D. Ecografía seriada de la vena cava inferior

E. BNP/NT-proBNP

F. CA125 seriado

12.- El término "congestión residual" te sugiere algo

A. Si

B. No

13.- ¿Cuándo consideras que un paciente tiene todavía algún grado de congestión residual al alta?

(Pregunta de texto libre).

## Resultados

1.- Años de ejercicio desde la finalización de la residencia: 253 respuestas

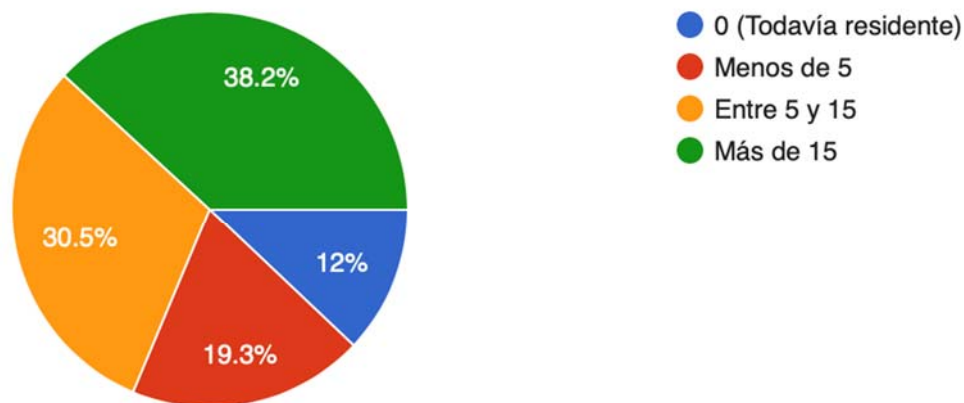

2.- Posición profesional actual: 248 respuestas

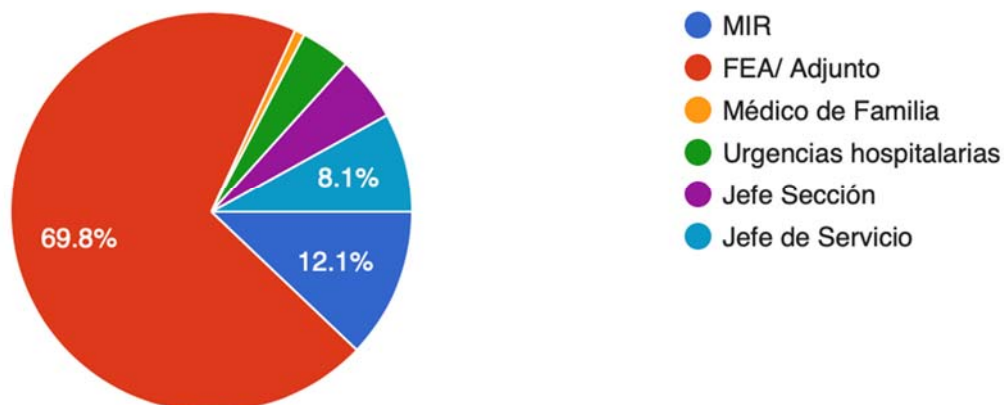

### 3.- Tamaño de mi hospital: 248 respuestas

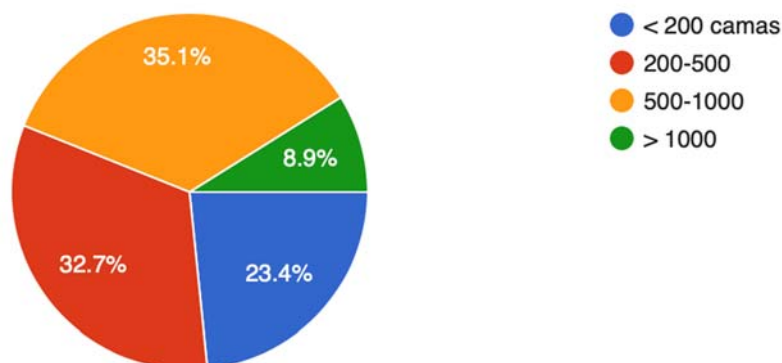

### 4.- Existe algún dispositivo asistencial específico para la IC: 249 respuestas

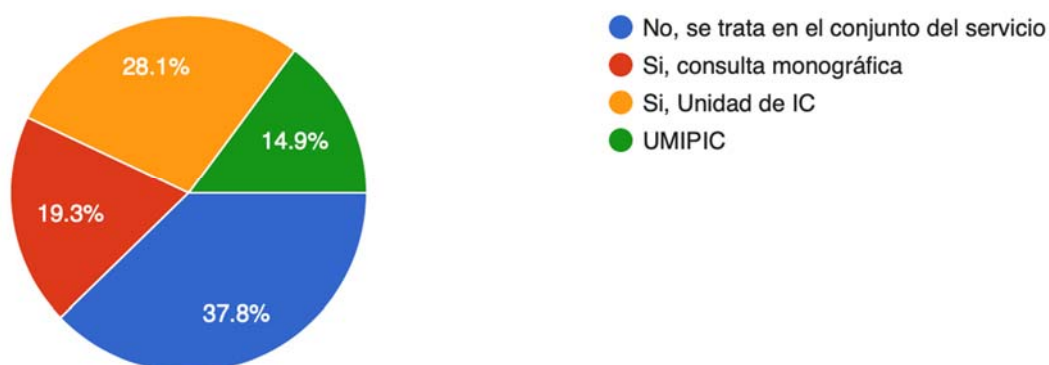

### 5.- Qué estancia media tienen los ingresos por IC en tu servicio: 246 respuestas

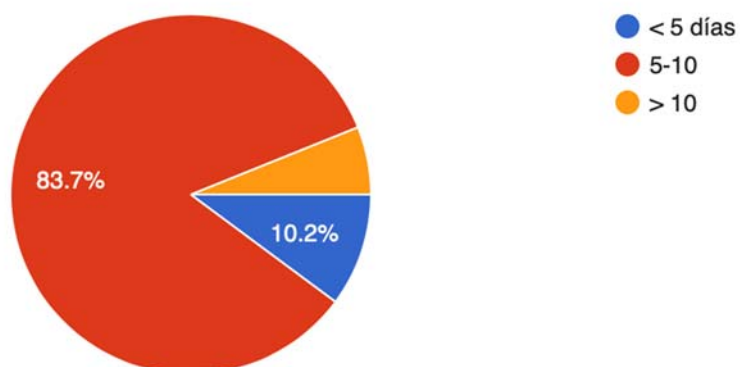

6.- Disponibilidad de recursos para los ingresos por IC en tu práctica habitual (señala uno o varios): 247 respuestas

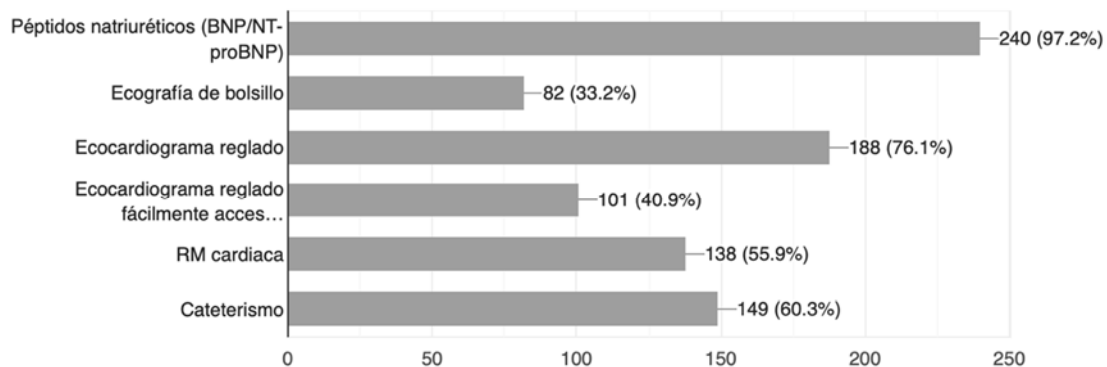

7.-Cuál de los siguientes (uno o varios) crees que es más fiable como síntoma o signo de congestión (señala uno o varios): 250 respuestas

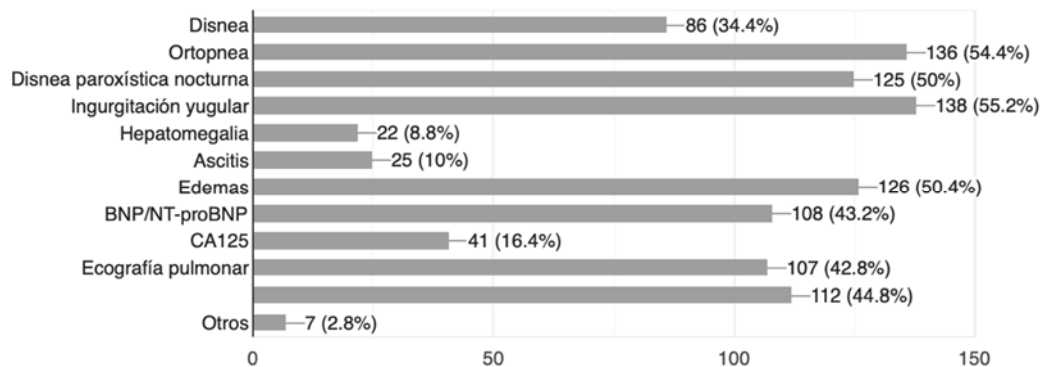

8.- Que criterio empleas para pasar los diuréticos de asa de la vía i.v. a la oral (uno o varios): 249 respuestas

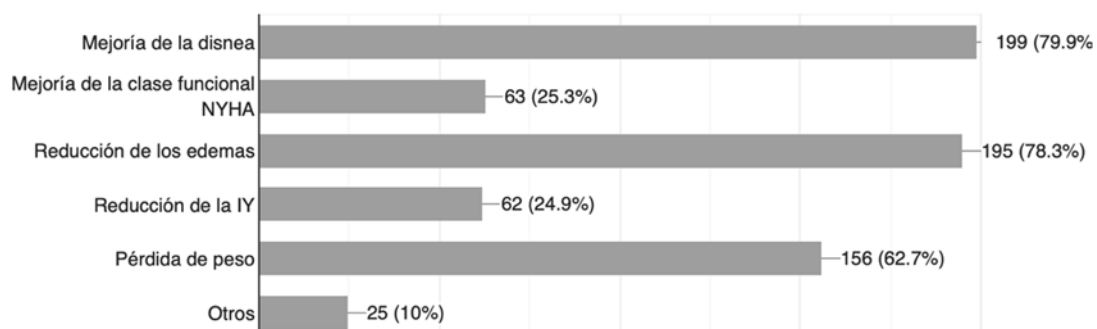

9.- Que criterio empleas para dar el alta al paciente que ha ingresado por descompensación de IC (uno o varios): 250 respuestas

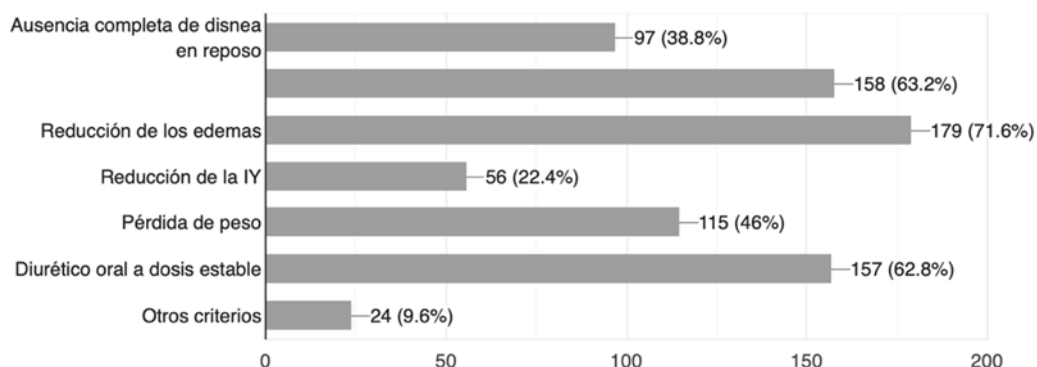

10.- ¿Mides la eficacia de los diuréticos de asa?: 250 respuestas

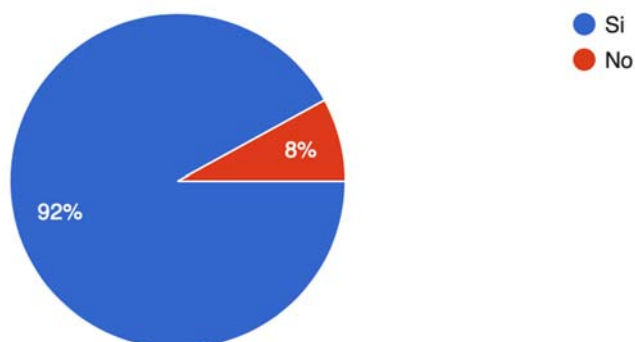

11.- Si lo mides, cómo lo haces (uno o varios):233 respuestas

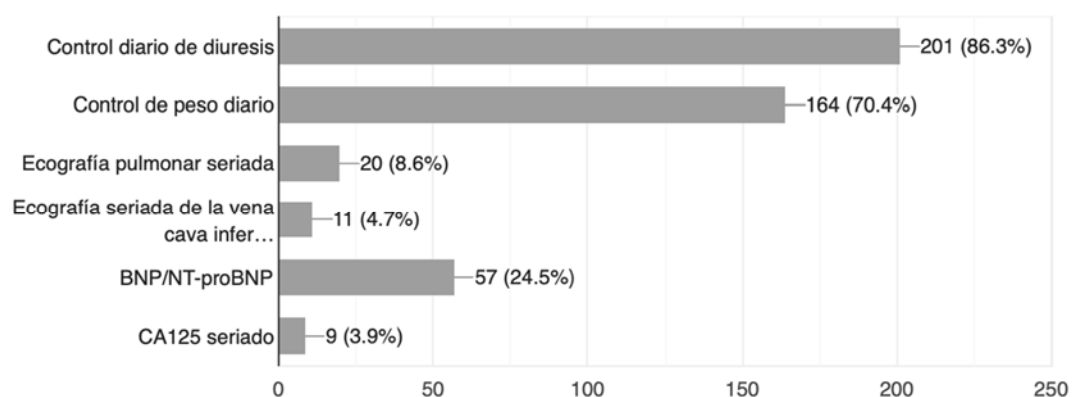

12.- El término "congestión residual" te sugiere algo: 253 respuestas

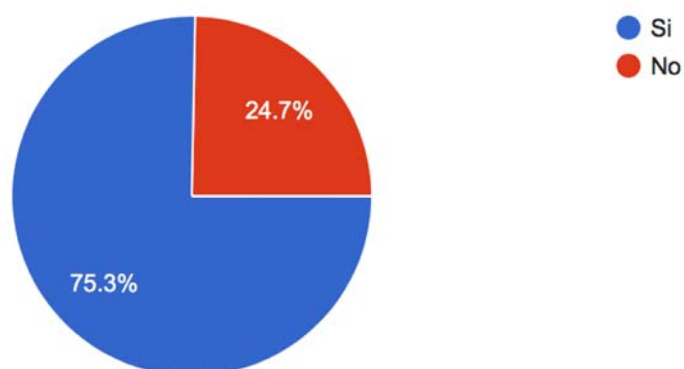

13.- ¿Cuándo consideras que un paciente tiene todavía algún grado de congestión residual al alta?

(Pregunta de texto libre).

159 respuestas

|                                                                                                                                                                                                                                                                                                                                                                                                                                                                                                                                                                       |
|-----------------------------------------------------------------------------------------------------------------------------------------------------------------------------------------------------------------------------------------------------------------------------------------------------------------------------------------------------------------------------------------------------------------------------------------------------------------------------------------------------------------------------------------------------------------------|
| ¿Cuándo consideras que un paciente tiene todavía algún grado de congestión residual al alta?                                                                                                                                                                                                                                                                                                                                                                                                                                                                          |
| Cuando tras un tto optimo adecuado sigue presentando sintomas congestivos                                                                                                                                                                                                                                                                                                                                                                                                                                                                                             |
| Si persiste ortopnea (mayor de la habitual), disnea con clase funcional superior a la NYHA nasal o edemas al alta. También si persisten líneas B en Ecografía pulmonar en pacientes sin otra patología respiratoria (fibrosis pulmonar , patología intersticial..)                                                                                                                                                                                                                                                                                                    |
| si dispusiera de ecografía, es la mejor forma de valorarlo                                                                                                                                                                                                                                                                                                                                                                                                                                                                                                            |
| Cuando presenta sintomatología y presencia de gran cantidad de líneas B (>15) a pesar de respuesta diurética +/- pérdida de peso                                                                                                                                                                                                                                                                                                                                                                                                                                      |
| DISNEAS Y EDEMA PERSISTENTE                                                                                                                                                                                                                                                                                                                                                                                                                                                                                                                                           |
| Por ahora no hay unos criterios estrictos (al menos yo los desconozco) que estimen de forma precisa este concepto que, como su nombre indica, expresa la existencia de congestión sistémica y pulmonar en un paciente que podría considerarse "estable". Se puede establecer una valoración cualitativa en función de la semiología, pero en pacientes ancianos es poco fiable. En mi práctica clínica el parámetro más fiable son los péptidos natriuréticos. Sin duda, la ecografía pulmonar también será un elemento valioso para la congestión residual pulmonar. |
| tos nocturna, ortopnea.                                                                                                                                                                                                                                                                                                                                                                                                                                                                                                                                               |
| Lo considero en cada paciente. Se puede valorar con EcoPulmonar, etc.                                                                                                                                                                                                                                                                                                                                                                                                                                                                                                 |

|                                                                                                                                                                                                                                           |
|-------------------------------------------------------------------------------------------------------------------------------------------------------------------------------------------------------------------------------------------|
| Líneas B en ecografía, sin clínica respiratoria                                                                                                                                                                                           |
| persisten edemas y no fuerzo más para preservar f renal, sobretodo congestión periférica (edemas),                                                                                                                                        |
| Si mejora de la disnea persistencia de edemas o no alcance de peso ideal                                                                                                                                                                  |
| Mantiene edemas, derrame pleural,                                                                                                                                                                                                         |
| Eco pulmonar evidente                                                                                                                                                                                                                     |
| Dosis de diuréticos asa elevadas o combinación y persistencia de IY o signos ecográficos - líneas B, cava                                                                                                                                 |
| Cuando persiste algún signo congestivo al alta (IY, fallo radiológico residual...)                                                                                                                                                        |
| Edemas. Pérdida de peso <1,5 kg en una semana tras diuresis.                                                                                                                                                                              |
| presencia de edemas, crepitantes                                                                                                                                                                                                          |
| Ingurgitación Yugular presente, BNP elevado y Signos ecográficos de congestión pulmonar                                                                                                                                                   |
| Crepitantes. Clase funcional. Eco pulmonar                                                                                                                                                                                                |
| Cuando persisten edemas u otros signos de congestión                                                                                                                                                                                      |
| Edemas, disnea de mínimos/moderados                                                                                                                                                                                                       |
| Aún no está en su peso seco pero ha                                                                                                                                                                                                       |
| Mejorado respecto al ingreso                                                                                                                                                                                                              |
| Líneas b en ecografía pulmonar                                                                                                                                                                                                            |
| Persistencia de edemas, crepitantes por auscultación, disnea de esfuerzo                                                                                                                                                                  |
| Siempre, pienso que los enfermos siempre tienen un grado de congestión residual. Los pacientes con IC pueden estar estables, pero siempre con un grado de sintomatología en la que otros factores influye el grado de congestión residual |
| Cuando persisten edemas                                                                                                                                                                                                                   |
| Eco sin solucionar                                                                                                                                                                                                                        |
| Persisten crepitantes o edemas.                                                                                                                                                                                                           |
| Si no alcanza peso seco                                                                                                                                                                                                                   |
| Lineas B en varios campos pulmonares por ecografía                                                                                                                                                                                        |
| Derrame pleural                                                                                                                                                                                                                           |
| Edemas                                                                                                                                                                                                                                    |

|                                                                                                                                                                                               |
|-----------------------------------------------------------------------------------------------------------------------------------------------------------------------------------------------|
| Cuando a pesar de mejorar el resto de síntomas de forma progresiva, y con dosis adecuada de diuretico, persiste cierto grado de edema en EEII o IY, más habitual en pc con FEpreservada o HTP |
| Persistencia edema y clase funcional estable                                                                                                                                                  |
| Persisten crepitantes                                                                                                                                                                         |
| IJ + o ECO pulmonar sugestiva, edema es menos específico                                                                                                                                      |
| Si persiste algún sintoma o signo relacionado añadido a una prueba radiologica eco o rx de torax que manifieste datos de la presencia de liquido.                                             |
| No estar en peso seco, persistencia edemas/crepitantes, CA 125 elevado                                                                                                                        |
| Disnea, edemas, IY, peso, ca 125 seriado                                                                                                                                                      |
| Edemas                                                                                                                                                                                        |
| Persistencia de edemas, disnea no resuelta completamente....                                                                                                                                  |
| Ausencia de resoluciln completa de la clinica                                                                                                                                                 |
| Persistencia de edemas, IV yugular, ortopnea                                                                                                                                                  |
| Si esta sintomatico                                                                                                                                                                           |
| Cuando continúa con cierto grado de edemas y/o líneas B a pesar de buena respuesta diurética                                                                                                  |
| Presencia de crepitantes o edemas, NYHA en mejoría pero aun no en su basal                                                                                                                    |
| continúa con derrame pleural o sobrecarga hídrica a nivel pulmonar                                                                                                                            |
| Cuando persiste algún signo o síntoma compatible con IC que no se explica por otra patología                                                                                                  |
| Persistencia de edemas, signos Eco gráficos de congestión en vena cava                                                                                                                        |
| persistencia de edemas, líneas B en eco pulmonar o minimos crepitantes en AP                                                                                                                  |
| Derrame pleural en Rx tórax, edemas                                                                                                                                                           |
| Edemas, IY y crepitantes pulmonares                                                                                                                                                           |
| Cuando no mejora disnea a pesar de dosis suficiente de diuréticos                                                                                                                             |
| Persisten signos clínicos o ecograficos                                                                                                                                                       |
| persistencia de edemas, VCI no colapsable/congestiva,                                                                                                                                         |
| Clase funcional                                                                                                                                                                               |
| Persisten edemas, persiste disnea o derrame pleual                                                                                                                                            |
| Cuando el paciente presenta algún sintoma o signo clínico por los cuales ingresó/consultó pero que han mejorado significativamente respecto al ingreso                                        |

|                                                                                                                                                                                                                                                                                       |
|---------------------------------------------------------------------------------------------------------------------------------------------------------------------------------------------------------------------------------------------------------------------------------------|
| cuando mantiene algún signo/síntoma de congestión. En el momento actual, se está poniendo en valor la realización de ecografía pulmonar seriada para identificar, de forma objetiva, la situación congestiva residual, que se vincula con mayor riesgo de descompensación y reingreso |
| Persiste cierto grado de edemas, crepitantes en bases...                                                                                                                                                                                                                              |
| Datos de congestión que no podemos objetivar en la exploración clínica básica y se puede detectar por otros medios como la Ecografía pulmonar o de la vena cava                                                                                                                       |
| Congestión pulmonar en eco, crepitantes basales                                                                                                                                                                                                                                       |
| Discretos edemas                                                                                                                                                                                                                                                                      |
| disnea                                                                                                                                                                                                                                                                                |
| Edemas, bioimpedancia pulmonar                                                                                                                                                                                                                                                        |
| Disnea                                                                                                                                                                                                                                                                                |
| En Rx hay signos de congestión                                                                                                                                                                                                                                                        |
| CUANDO EL CCS ES >0                                                                                                                                                                                                                                                                   |
| Persiste edemas y disnea con Eco con congestión leve                                                                                                                                                                                                                                  |
| Si no ha mejorado el peso                                                                                                                                                                                                                                                             |
| Cuando la exploración así lo sugiere                                                                                                                                                                                                                                                  |
| Edemas o disnea superior a subestado basal a pesar de mejoría                                                                                                                                                                                                                         |
| Entiendo como congestión residual a aquellos pacientes que presentan edemas u otros signos, sin síntomas y que por tanto se encuentran en situación basal y estable.                                                                                                                  |
| IY, Rx tórax con DP, datos de congestión radiológica, ecografía de tórax                                                                                                                                                                                                              |
| Si precisa de altas dosis de diurético previo al alta                                                                                                                                                                                                                                 |
| evidencia de congestión pulmonar mediante ecografía pulmonar, pero no disponemos de esa técnica.....                                                                                                                                                                                  |
| Persistencia edemas o derrame o plural crónico, no recuperación situación funcional previa, persistencia de BNP /NT-proBNP elevado, limitación manejo terapéutico por deterioro renal, hipotensión...hiponatremia que dificulte eliminación completa de signos congestivos...         |
| Cuando no se consigue su situación basal completa al alta                                                                                                                                                                                                                             |
| Paciente que presenta persistencia de signos de congestión al alta o elevación de NT pro BNP y que presentan mayor riesgo de reingreso                                                                                                                                                |

|                                                                                                                                                                                                                                                                                                                        |
|------------------------------------------------------------------------------------------------------------------------------------------------------------------------------------------------------------------------------------------------------------------------------------------------------------------------|
| Si persiste con disnea                                                                                                                                                                                                                                                                                                 |
| Cuando hay presente edema pulmonar                                                                                                                                                                                                                                                                                     |
| Edemas cronicos/derrame                                                                                                                                                                                                                                                                                                |
| Cuando presenta aún auscultación de crepitantes y lines B de Kerley en Rx de tórax                                                                                                                                                                                                                                     |
| Con una EX compatible y datos de CA 125 no resultó del todo. Ecografía torácico compatible                                                                                                                                                                                                                             |
| En función de la persistencia de líquido en la Eco pulmonar                                                                                                                                                                                                                                                            |
| No realizamos Ecografía pulmonar al alta. Básicamente, teniendo en cuenta lis datos del Ecocardio previo (24/48 horas del ingreso), con los datos de congestión que nos proporciona, valorando volumen perdido,respuesta a los a diuréticos y función renal. Cuanto “más seco”, en general, asumimos menos congestión. |
| Ecografía pulmonar                                                                                                                                                                                                                                                                                                     |
| si no ha alcanzado peso seco                                                                                                                                                                                                                                                                                           |
| crepitantes en la exploración física y, siempre que es posible, ecografía pulmonar.                                                                                                                                                                                                                                    |
| Mantiene líneas B en la eco pulmonar y una VCI mayor de 20 mm sin colapso inspiratorio.                                                                                                                                                                                                                                |
| Signos clínicos                                                                                                                                                                                                                                                                                                        |
| Cuando presenta derrame pleural bibasal permanente                                                                                                                                                                                                                                                                     |
| Persistencia de sobrecarga a pesar de tratamiento diurético adecuado                                                                                                                                                                                                                                                   |
| edemas, IJ, disnea,                                                                                                                                                                                                                                                                                                    |
| Edemas, ascitis y/o derrame pleural persistente o refractario.                                                                                                                                                                                                                                                         |
| Signos de edemas en resolución, persiste congestión en Rx control, BNP control al alta                                                                                                                                                                                                                                 |
| Si existe derrame, edemas, ascitis o aumento considerable respecto a su peso seco esperable                                                                                                                                                                                                                            |
| Cuando en ecografía pulmonar persisten un número elevado de líneas B e indica un mayor número de reingresos por IC                                                                                                                                                                                                     |
| Congestion pulmonar residual                                                                                                                                                                                                                                                                                           |
| Persiste signos de congestion pùlmonar al alta (ecografía mas sensible que RX)                                                                                                                                                                                                                                         |
| Persiste signos de congestion pùlmonar al alta (ecografía mas sensible que RX)                                                                                                                                                                                                                                         |
| si persiste disnea a l’esfuerzo, edemas y Rx torax con lineas de kerley. No realizamos todavia ecografía pulmonar.                                                                                                                                                                                                     |
| Disnea CF III-IV u ortopnea                                                                                                                                                                                                                                                                                            |

|                                                                                                                                                                                                  |
|--------------------------------------------------------------------------------------------------------------------------------------------------------------------------------------------------|
| cuando no está en su situación basal, presenta deterioro de CF o mas signos de congestión de los habituales                                                                                      |
| Persistencia de edemas y/o ingurgitacion yugular y/o no recuperacion de peso 'seco' basal                                                                                                        |
| Datos de ecografía pulmonar                                                                                                                                                                      |
| Cuando a pesar de tratamiento diurético intensivo no consigo reducción completa de signos congestivos y persisten líneas kerley o derrame en Rx , motivo por el que el paciente suele reingresar |
| En mi práctica clínica habitual (no empleamos la ecografía pulmonar de forma rutinaria) cuando la auscultación no se ha normalizada o persisten datos de IC en la Rx de tórax.                   |
| Si en la ecografía veo línea B o VCI no colapsa Y el paciente no tiene clínica ni signos de congestión                                                                                           |
| Si en la ecografía veo línea B o VCI no colapsa Y el paciente no tiene clínica ni signos de congestión                                                                                           |
| Cuando existe algún dato de sobrecarga en Rx , en analítica o clínicos a pesar de haber alcanzado la estabilidad y control de síntomas                                                           |
| Cuando persiste congestión pulmonar a pesar del tratamiento diurético.                                                                                                                           |
| Edemas, probnp elevado...                                                                                                                                                                        |
| Peor clase funciona la la habitual, crepitantes, edemas, congestión en Rx de tórax.                                                                                                              |
| persistencia de edemas, derrame pleural                                                                                                                                                          |
| Si tiene edemas, ingurgitación yugular u ortopnea.                                                                                                                                               |
| Cuando por ecografía pulmonar se detectan una mayor cantidad de líneas B                                                                                                                         |
| Persistencia de líneas B, derrame pleural , ascitis o edemas                                                                                                                                     |
| Se valora la cogestion pulmonar por ecografia. Nosotros no guiamos de la clinica, no contamos con esta técnica alta o seguimiento en la semana.                                                  |
| abundantes líneas B pulmonares, disnea de minimos esfuerzos                                                                                                                                      |
| CONTINÚA CON LINEAS B EN ECO PULMONAR, EL PESO NO ES EL MISMO QUE EN FASE DE ESTABILIDAD O LA VENA CAVA NO TIENE EL MISMO COMPORTAMIENTO QUE EN FASE ESTABILIDAD.                                |
| Cuándo persisten signos y síntomas de congestión y el paciente no tolera más tto                                                                                                                 |
| Cuando persiste edema en algún grado, no ha disminuido el probnp, la radiografía de torax muestra aún algún dato de congestión o persisten líneas b en la Eco torácica                           |

|                                                                                                                                                                                                                                                |
|------------------------------------------------------------------------------------------------------------------------------------------------------------------------------------------------------------------------------------------------|
| Cuando presenta edemas, diuresis escasa a pesar de los edemas. No tenemos opción a ecografía pulmonar                                                                                                                                          |
| Mantiene líneas B en la endoscopia pulmonar                                                                                                                                                                                                    |
| Mantiene líneas B en la endoscopia pulmonar                                                                                                                                                                                                    |
| Cuando persiste derrame pleural y líneas B en la ecografía de pulmón                                                                                                                                                                           |
| Sintomático, eco clínica con signos de congestión                                                                                                                                                                                              |
| Persistencia de edemas, sobrepeso (respecto a su peso seco). No suelo dar alta si congestión pulmonar o mayor requerimiento de FiO2 en caso de Insuf. resp. Crónica                                                                            |
| Persiste tercer espacio o algún grado de congestión pulmonar                                                                                                                                                                                   |
| Se establece basicamente por la persistencia de cometas pulmonares en ecografía portátil o datos de persistencia de congestión en bioimpedancia pulmonar                                                                                       |
| edemas o peso mayor del basal seco                                                                                                                                                                                                             |
| Cuando presenta redistribución vascular en Rx y/o VCI dilatada                                                                                                                                                                                 |
| Edema, y tras valoración eco pulmonar (no sistemático)                                                                                                                                                                                         |
| Cuando después de optimizado el tto diurético presenta datos de estasis y disnea y asumo que es de forma crónica o en el contexto de cuadro que descompensa la IC (Véase infección)                                                            |
| Presencia de crepitantes o edema sin estar sintomático (cardiopatía avanzada)                                                                                                                                                                  |
| Cuando a dosis plenas toleradas el paciente mejora su clase funcional, pero mantiene cierto grado de disnea o edemas. Subjetivamente el paciente se encuentra mejor pero mantiene signos de sobrecarga de volumen a pesar de intensificar tto. |
| Es preferible considerar su existencia en todos, especialmente en los que no has encontrado una causa desencadenante y/o no has podido corregirla.                                                                                             |
| IY, edemas,                                                                                                                                                                                                                                    |
| Disnea paroxística nocturna persistente                                                                                                                                                                                                        |
| eco pulmonar con más 15 líneas B de Kerley                                                                                                                                                                                                     |
| Disnea de reposo                                                                                                                                                                                                                               |
| Cuando persisten edemas, derrame pleural o cuando tiene un peso mayor del suyo habitual                                                                                                                                                        |
| > 15 línea B en ecografía pulmonar                                                                                                                                                                                                             |
| radiografía de tórax con patrón intersticial y derrame                                                                                                                                                                                         |

|                                                                                                                                             |
|---------------------------------------------------------------------------------------------------------------------------------------------|
| Disnea                                                                                                                                      |
| Signos y síntomas congestivos, no obtención del peso seco basal                                                                             |
| Cuando todavía no está con dosis habitual de diuréticos                                                                                     |
| Estamos valorando introducir la ecografía pulmonar al alta, pero no lo tenemos instaurado                                                   |
| cuando tiene síntomas y signos sugestivos de insuficiencia cardiaca                                                                         |
| cuando aún persisten signos físicos pese a constatar resolución de síntomas                                                                 |
| Mejoría clínica pero sin llegar a peso seco                                                                                                 |
| Persistencia de crepitantes húmedos en la auscultación, además de ingurgitación yugular con radiografía con signos leves de fallo cardíaco. |
| Por la clínica, radiología torácica                                                                                                         |
| cuando persisten edemas, líneas B ( si es posible mirarlas), IJ ,                                                                           |
| Persistencia de disnea en reposo, edemas, ingurgitaci(n yugular,                                                                            |
| Cuando no se encuentra en peso seco o se marcha con discretos edemas                                                                        |
| Disnea de esfuerzo, BNP alto                                                                                                                |
| Lo ideal sería por eco pulmonar                                                                                                             |
| Cuando persisten signos congestivos que creo pueden manejarse en domicilio.                                                                 |
| realizo seguimiento estrecho del paciente. Utilizaría la ecografía pulmonar si tuviese experiencia                                          |
